# Supplementary material
Source: publisher figshare collection journal article supplement (https://gsapubs.figshare.com/articles/dataset/_/25439149)
Supplement: Supplementary file 1 [file 45140101]

Xu, W., Zhang, D., Yan, M., Zhang, W., Zhang, Z., Xu, Z., Zhang, Y., Song, C., and Fang, X., 2024, Moderate magnitude clockwise rotation of the Yunlong Basin: Implications for synchronous Eocene rotation of the southeastern Tibetan Plateau: *GSA Bulletin*, <https://doi.org/10.1130/B37395.1>.

## Supplemental Material

**Figure S1.** E/I inclination shallowing corrections of the ChRM directions from the studied Yunlong Formation.

**Table S1.** Cretaceous–Oligocene paleomagnetic results from the Lanping-Simao terrane and the eastern Qiangtang terrane.

**Table S2.** Paleomagnetic rotation results in the Gonjo, Mangkang, Lanping, Yunlong, and Mengla area.

1 Supporting Material for

2 **Moderate magnitude clockwise rotation of the Yunlong Basin: implications for**  
3 **synchronous Eocene rotation of the Southeastern Tibetan Plateau**

4 Wanlong Xu<sup>1,2†</sup>, Dawen Zhang<sup>3†</sup>, Maodu Yan<sup>1,2\*</sup>, Weilin Zhang<sup>1</sup>, Zhenbei Zhang<sup>1,2</sup>,  
5 Zunbo Xu<sup>1,2</sup>, Yuwei Zhang<sup>1,2</sup>, Chunhui Song<sup>4</sup>, Xiaomin Fang<sup>1,2</sup>

6 <sup>1</sup>State Key Laboratory of Tibetan Plateau Earth System, Environment and Resources (TPESER), Institute of  
7 Tibetan Plateau Research, Chinese Academy of Sciences, Beijing 100101, China

8 <sup>2</sup>University of Chinese Academy of Sciences, Beijing 100049, China

9 <sup>3</sup>School of Tourism and Resources Environment, Zaozhuang University, Zaozhuang 277160, China

10 <sup>4</sup>School of Earth Sciences, Lanzhou University, Lanzhou 730000, China

11  
12  
13 **Contents of this file**

14  
15 Tables S1 to S2

16  
17 **Introduction**

18 This supporting information includes one figure and two tables that present the  
19 previous published paleomagnetic results and our new result. Figure S1 shows the E/I  
20 inclination shallowing correction results. Table S1 is a collection of Cretaceous-  
21 Oligocene paleomagnetic results in the Lanping-Simao Terrane and the eastern  
22 Qiangtang Terrane. Table S2 is the rotational magnitude of different localities around  
23 the Eastern Himalaya Syntaxis.

24

**(a) E/I shallowing correction of all ChRM directions (332 data points)**

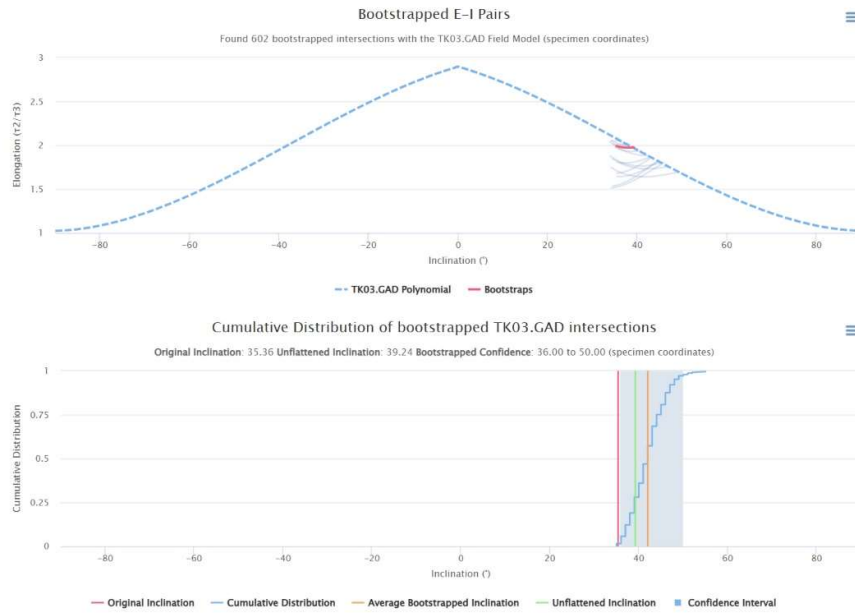

**(b) E/I shallowing correction after removing disperse ChRM directions (308 data points)**

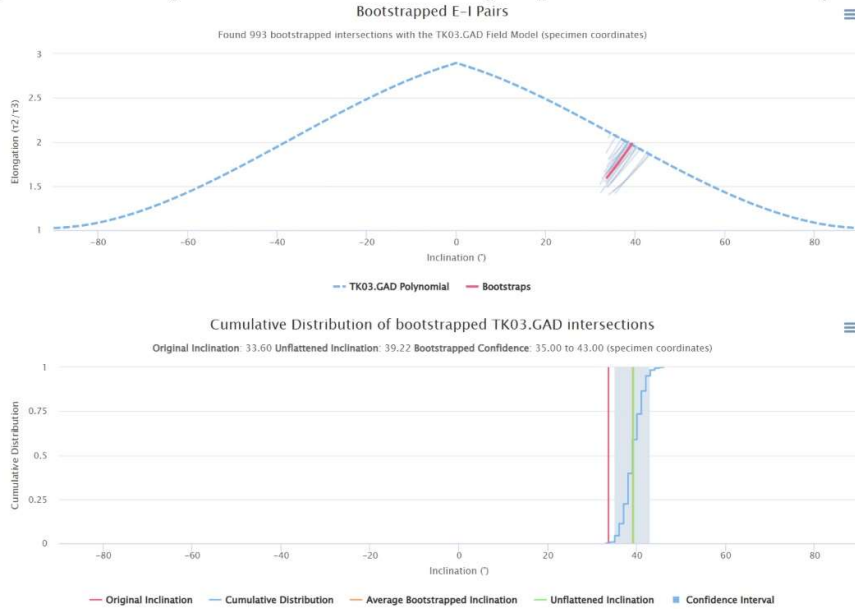

25

26

27 Figure S1. E/I inclination shallowing corrections of the ChRM directions from the studied  
28 Yunlong Formation. (a) The mean inclination of 332 ChRM directions increases from 35.36°  
29 to 39.24° (confidence interval: 36–50°); (b) The mean inclination of 308 ChRM directions  
30 increases from 33.6° to 39.22° (confidence interval: 35–43°) after removing 24 dispersed data  
31 points. Given the present latitude of 25.9°N, with respect to the Eurasian reference, it suggests  
32 ~530 ± 280 km northward movements of basin since 79–61 Ma.

**Table S1.** Cretaceous-Oligocene paleomagnetic results from the Lanping-Simao Terrane and the eastern Qiangtang Terrane

| Location                     | Latitude<br>(°N) | Longitude<br>(°E) | Formation          | N(n) | Age             | Dec (s) | Inc (s) | $\alpha_{95}$ | strike | 95%<br>CI | $\delta$ strike | $\delta$ D | Reliability<br>criteria | Reference              |
|------------------------------|------------------|-------------------|--------------------|------|-----------------|---------|---------|---------------|--------|-----------|-----------------|------------|-------------------------|------------------------|
| <b>Lanping-Simao Terrane</b> |                  |                   |                    |      |                 |         |         |               |        |           |                 |            |                         |                        |
| Yunlong                      | 25.8             | 99.4              | Nanxin             | 20   | K1 (126-100 Ma) | 40.2    | 49.9    | 3.9           | 146.1  | 5.5       | 0               | 40.2       | 1,2,4,5                 | Sato et al. (1999)     |
| Yunlong                      | 25.7             | 99.4              | Nanxin+Hutousi     | 9    | K1 (126-100 Ma) | 34.0    | 52.4    | 7.3           | 146.1  | 5.5       | 0               | 34.0       | 1,2,3,4,5               | Yang et al.(2001a)     |
| Yongping                     | 25.5             | 99.5              | Jingxing           | 12   | K1 (126-100 Ma) | 42.0    | 51.1    | 15.7          | 150.1  | 6.2       | 4.0             | 38.0       | 1,2,4,5                 | Funahara et al. (1993) |
| Weishan                      | 25.2             | 100.2             | Nanxin+Hutousi     | 18   | K1 (126-100 Ma) | 64.3    | 48.5    | 4.7           | 169.7  | 9.2       | 23.6            | 40.7       | 1,2,3,4,5               | Tong et al. (2014)     |
| Jingdong                     | 24.5             | 100.8             | Nanxin             | 13   | K1 (126-100 Ma) | 8.3     | 48.8    | 7.7           | 152.3  | 4.0       | 6.2             | 2.1        | 1,2,4,5                 | Tanaka et al. (2008)   |
| Zhenyuan                     | 24.0             | 101.1             | Nanxin             | 7    | K1 (126-100 Ma) | 61.8    | 46.1    | 8.1           | 172.1  | 5.7       | 26.0            | 35.8       | 1,2,4,5                 | Tanaka et al. (2008)   |
| Zhenyuan                     | 23.94            | 101.24            | Mangang            | 8    | K1 (126-100 Ma) | 52.4    | 45.5    | 6.3           | 172.1  | 5.7       | 26.0            | 26.4       | 1,2,3,4,5               | Zhang et al. (2012)    |
| Jinggu                       | 23.5             | 100.4             | Mangang            | 47   | K1 (126-100 Ma) | 77.0    | 43.0    | 2.9           | 190.2  | 3.8       | 44.1            | 32.9       | 1,2,3,4,5               | Gao et al. (2015)      |
| Puer                         | 23.0             | 101.0             | Nanxin+Jingxing    | 25   | K1 (126-100 Ma) | 59.9    | 45.2    | 5.1           | 156.7  | 3.1       | 10.6            | 49.3       | 1,2,3,4,5               | Sato et al. (2007)     |
| Puer                         | 22.74            | 101.11            | Mangang            | 14   | K1 (126-100 Ma) | 46.2    | 46.6    | 5.6           | 156.7  | 3.1       | 10.6            | 35.6       | 1,2,3,4,5               | Zhang et al. (2012)    |
| Zhengwan                     | 22.8             | 100.9             | Nanxin             | 11   | K1 (126-100 Ma) | 51.8    | 47.9    | 6.9           | 156.1  | 3.1       | 10.0            | 41.8       | 1,2,4,5,6               | Kondo et al. (2012)    |
| Mengla                       | 21.5             | 101.7             | Mangang&Wushahe    | 14   | K1 (126-100 Ma) | 46.9    | 42.2    | 7.7           | 164.1  | 9.5       | 18.0            | 28.9       | 1,2,3,4,5               | Tong et al. (2013)     |
| Mengla                       | 21.4             | 101.6             | Nanxin&Jingxing    | 13   | K1 (126-100 Ma) | 51.2    | 46.4    | 5.6           | 164.1  | 9.5       | 18.0            | 33.2       | 1,2,4,5                 | Tanaka et al. (2008)   |
| Dadugang                     | 22.4             | 101.0             | Nanxin             | 12   | K1 (126-100 Ma) | 64.1    | 48.1    | 7.3           | 144.1  | 5.6       | -2.0            | 66.1       | 1,2,4,5                 | Kondo et al. (2012)    |
| Menglun                      | 21.9             | 101.2             | Mangang&Wushahe    | 19   | K1 (126-100 Ma) | 46.2    | 45.9    | 11.0          | 113.9  | 9.8       | -32.0           | 78.4       | 1,2,3,4,5               | Tong et al. (2013)     |
| Yunlong                      | 25.8             | 99.4              | Yunlong            | 34   | 75-61 Ma        | 56.0    | 34.3    | 2.7           | 146.1  | 5.5       | 0               | 56.0       | 1,2,3,5,6               | This study             |
| Lanping                      | 26.0             | 99.4              | Baoxiangsi&Denghei | 9    | E (56-34 Ma)    | 86.1    | 39.8    | 11.2          | 191.5  | 6.3       | 45.4            | 40.7       | 1,2,4,5                 | Sato et al. (2001)     |
| Lanping                      | 26.0             | 99.4              | Baoxiangsi         | 12   | E (56-34 Ma)    | 84.5    | 39.4    | 9.6           | 191.5  | 6.3       | 45.4            | 39.1       | 1,2,3,4,5               | Yang et al. (2020)     |
| Mengla                       | 21.5             | 101.7             | Xiaoyakou          | 11   | E (56-34 Ma)    | 51.7    | 33.4    | 8.7           | 164.1  | 9.5       | 18.0            | 33.7       | 1,2,3,4,5,6             | Yang et al. (2001b)    |
| Mengla                       | 21.5             | 101.7             | Datangwan          | 17   | E-O (56-23 Ma)  | 41.8    | 23.8    | 5.8           | 164.1  | 9.5       | 18.0            | 23.8       | 1,2,3,4,5               | Tong et al. (2013)     |

|                             |      |       |                                      |      |                        |       |       |      |       |      |   |       |           |                             |
|-----------------------------|------|-------|--------------------------------------|------|------------------------|-------|-------|------|-------|------|---|-------|-----------|-----------------------------|
| <i>Yunlong</i>              | 25.7 | 99.4  | <i>Jingxing</i>                      | (23) | <i>K1</i>              | 59.7  | 41.0  | 11.9 | 146.1 | 5.5  |   |       | 1,5,6     | <i>Yang et al. (2001a)</i>  |
| <i>Wuyin</i>                | 25.1 | 100.1 | <i>Jingxing</i>                      | 6    | <i>K1</i>              | 15.4  | 44.8  | 4.6  | 154.9 | 11.0 |   |       | 1,3,4,5   | <i>Tong et al. (2014)</i>   |
| <i>Zhenyuan</i>             | 24.0 | 101.1 | <i>Nanxin</i>                        | 4    | <i>K1</i>              | 324.2 | -49.4 | 6.4  | 172.1 | 5.7  |   |       | 1,4,5     | <i>Tanaka et al. (2008)</i> |
| <i>Jinggu</i>               | 23.5 | 100.7 | <i>Mengla</i>                        | (32) | <i>E-O</i>             | 84.7  | 38.9  | 7.6  | 190.2 | 3.8  |   |       | 1,2,5     | <i>Chen et al. (1995)</i>   |
| <i>Jinggu</i>               | 23.5 | 100.8 | <i>Mengla</i>                        | 6    | <i>E3-O</i>            | 73.1  | 39.9  | 11.8 | 190.2 | 3.8  |   |       | 1,2,5     | <i>Yang et al. (2001b)</i>  |
| <i>Jinggu</i>               | 23.5 | 100.8 | <i>Mengyejing</i>                    | (35) | <i>P</i>               | 23.9  | 51.6  | 7.8  | 190.2 | 3.8  |   |       | 1,2,5     | <i>Chen et al. (1995)</i>   |
| <i>Jinggu</i>               | 23.5 | 100.7 | <i>Mengyejing</i>                    | 12   | <i>P</i>               | 36.1  | 31.5  | 8.4  | 190.2 | 3.8  |   | Remag |           | <i>Li et al. (2017)</i>     |
| <i>Jinggu</i>               | 23.5 | 100.7 | <i>Lower Denghei</i>                 | 12   | <i>E</i>               | 35.2  | 35.7  | 6.5  | 190.2 | 3.8  |   | Remag |           | <i>Li et al. (2017)</i>     |
| <i>Jinggu</i>               | 23.5 | 100.7 | <i>Upper Denghei</i>                 | 18   | <i>E</i>               | 53.0  | 33.6  | 4.3  | 190.2 | 3.8  |   | Remag |           | <i>Li et al. (2017)</i>     |
| <i>Jinggu</i>               | 23.5 | 100.7 | <i>Lower Mengla</i>                  | 11   | <i>E-O</i>             | 38.4  | 37.3  | 9.7  | 190.2 | 3.8  |   | Remag |           | <i>Li et al. (2017)</i>     |
| <i>Jinggu</i>               | 23.5 | 100.7 | <i>Middle Mengla</i>                 | 17   | <i>E-O</i>             | 38.6  | 33.0  | 5.7  | 190.2 | 3.8  |   | Remag |           | <i>Li et al. (2017)</i>     |
| <i>Jinggu</i>               | 23.5 | 100.7 | <i>Upper Mengla</i>                  | 14   | <i>E-O</i>             | 50.8  | 31.8  | 5.8  | 190.2 | 3.8  |   | Remag |           | <i>Li et al. (2017)</i>     |
| <i>Jinggu</i>               | 23.4 | 100.9 | <i>Mangang</i>                       | 8    | <i>K1</i>              | 79.4  | 43.3  | 9.1  | 190.2 | 3.8  |   |       | 1,2,5     | <i>Huang et al. (1993)</i>  |
| <i>Jinggu</i>               | 23.4 | 100.6 | <i>Mangang</i>                       | 7    | <i>K1</i>              | 295.8 | -36.0 | 6.3  | 190.2 | 3.8  |   |       | 1,4,5     | <i>Chen et al. (1995)</i>   |
| <i>Jinggu</i>               | 23.4 | 100.4 | <i>Jingxing</i>                      | (10) | <i>K1</i>              | 84.4  | 39.6  | 17.8 | 190.2 | 3.8  |   |       | 1,5       | <i>Chen et al. (1995)</i>   |
| <i>Menglun</i>              | 21.9 | 101.2 | <i>Mankuanhe</i>                     | 6    | <i>K2</i>              | 33.2  | 30.9  | 8.2  | 113.9 | 9.8  |   |       | 1,3,4,5   | <i>Tong et al. (2013)</i>   |
| <i>Mengban</i>              | 21.8 | 101.6 | <i>Mengyejing&amp;<br/>Xiaoyakou</i> | 6    | <i>P+E</i>             | 43.5  | 2.0   | 13.4 | 158.4 | 12.0 |   |       | 1,3,5     | <i>Tong et al. (2013)</i>   |
| <i>Mengban</i>              | 21.8 | 101.6 | <i>Mankuanhe&amp;<br/>Mangang</i>    | 4    | <i>K1</i>              | 50.5  | 31.0  | 6.4  | 158.4 | 12.0 |   |       | 1,3,4,5   | <i>Tong et al. (2013)</i>   |
| <i>Mengla</i>               | 21.6 | 101.4 | <i>Mangang</i>                       | 10   | <i>K1</i>              | 60.8  | 37.8  | 7.6  | 167.7 | 9.5  |   |       | 1,2,5     | <i>Huang et al. (1993)</i>  |
| <i>Yunlong<br/>(mean)</i>   | 25.7 | 99.4  | <i>Nanxin+Hutousi</i>                | 29   | <i>K1 (126-100 Ma)</i> | 37.6  | 51.1  | 3.6  | 146.1 | 5.5  | 0 | 34.0  | 1,2,3,4,5 | <i>Yang et al. (2001a)</i>  |
| <i>Lanping-Simao (mean)</i> |      |       |                                      |      | <i>K1</i>              | 36.3  | 47.2  | 2.8  |       |      |   |       |           |                             |
| <i>Lanping-Simao (mean)</i> |      |       |                                      |      | <i>E</i>               | 37.7  | 37.6  | 7.1  |       |      |   |       |           |                             |

### Eastern Qiangtang Terrane

|                 |             |             |                |                         |              |           |           |            |              |            |             |                       |
|-----------------|-------------|-------------|----------------|-------------------------|--------------|-----------|-----------|------------|--------------|------------|-------------|-----------------------|
| <b>Mangkang</b> | 29.7        | 98.4        | lawula         | 20                      | 36.4-33.4 Ma | 62.2      | 47.6      | 5.5        | 168.4        | 6.6        | 1,2,3,4,5   | Xu et al., (2024)     |
| <b>Gonjo</b>    | 31.0        | 98.2        | Gonjo&Ranmugou | 27                      | 67-52 Ma     | 50.1      | 26.6      | 2.7        | 143.1        | 5.3        | 1,2,3,4,5,6 | Li et al., (2020)     |
| <b>Gonjo</b>    | 31.0        | 98.2        | Ranmugou       | 11                      | 48-41 Ma     | 32.8      | 24.5      | 4.0        | 143.1        | 5.3        | 1,2,3,4,5,6 | Li et al., (2020)     |
| <i>Mangkang</i> | <i>29.7</i> | <i>98.6</i> | <i>Laoran</i>  | <i>5</i><br><i>(15)</i> | <i>K</i>     | <i>48</i> | <i>56</i> | <i>8.8</i> | <i>168.4</i> | <i>6.6</i> | <i>5</i>    | Otofuji et al. (1990) |

Note: N(n): number of sampling sites(specimens); Dec(s): declinations after tilt-correction; Inc(s): inclinations after tilt-correction;  $\alpha_{95}$ : radius of the circle of 95% confidence of the paleomagnetic directions; strikes: mean directions of the tectonic lines; 95% CI: 95% confidence interval of the strikes;  $\delta$ strike: differences between the strikes and the reference strike (146.1°);  $\delta$ D: declinations after subtracting  $\delta$ strike; K1: Early Cretaceous; K2: Late Cretaceous; P: Paleocene; E: Eocene; O: Oligocene. Data reliability criteria are referred to Meert et al. (2020). The data in italic are excluded to further analyses due to low reliability.

**Table S2.** Paleomagnetic rotation results in the Gonjo, Mangkang, Lanping, Yunlong and Mengla area

| Name     | Location (°N/°E) | Age (Ma)  | Middle Age (Ma) | N  | Observed poles |           |          | R    | $\delta$ R | Reference           |
|----------|------------------|-----------|-----------------|----|----------------|-----------|----------|------|------------|---------------------|
|          |                  |           |                 |    | Lat. (°N)      | Lon. (°E) | $A_{95}$ |      |            |                     |
| Gonjo    | 31/98.2          | 67-52     | 59.5            | 27 | 41.2           | 196.8     | 2.7      | 37.5 | 5.7        | Li et al. (2020)    |
| Gonjo    | 31/98.2          | 48-41     | 44.5            | 11 | 55.9           | 213.3     | 3.1      | 23.9 | 11.0       | Li et al. (2020)    |
| Mangkang | 29.7/98.6        | 36.4-33.4 | 34.9            | 20 | 36.4           | 173.1     | 4.8      | 53.0 | 8.0        | Xu et al. (2024)    |
| Lanping  | 26/99.4          | 45-34     | 39.5            | 12 | 14.3           | 171.2     | 10.0     | 74.2 | 11.7       | Yang et al. (2020)  |
| Yunlong  | 25.8/99.4        | 79-61     | 70.0            | 31 | 38.1           | 185.0     | 2.3      | 45.2 | 5.1        | This study          |
| Yunlong  | 25.7/99.4        | 126-100   | 113.4           | 9  | 59.6           | 167.4     | 9.2      | 23.3 | 10.6       | Yang et al. (2001a) |
| Yunlong  | 25.7/99.4        | 126-100   | 113.4           | 20 | 54.4           | 171.9     | 4.4      | 31.0 | 7.2        | Sato et al. (1999)  |

Note: N: number of sampling sites; Lat. and Lon.: latitudes, longitudes of the paleomagnetic poles;  $A_{95}$ : radius of the circle of 95% confidence of the paleomagnetic poles; R: rotations with respected to Eurasian reference poles;  $\delta$ R: errors of rotations. Rotations are calculated by the online application [www.APWP-online.org](http://www.APWP-online.org) (Vaes et al., 2023)

## Reference

- Chen, H., Dobson, J., Heller, F., and Hao, J., 1995, Paleomagnetic Evidence for Clockwise Rotation of the Simao Region since the Cretaceous - a Consequence of India-Asia Collision: *Earth and Planetary Science Letters*, v. 134, no. 1-2, p. 203-217, [http://doi.org/10.1016/0012-821X\(95\)00118-V](http://doi.org/10.1016/0012-821X(95)00118-V).
- Funahara, S., Nishiwaki, N., Murata, F., Otofujii, Y., and Wang, Y. Z., 1993, Clockwise Rotation of the Red River Fault Inferred from Paleomagnetic Study of Cretaceous Rocks in the Shan-Thai-Malay Block of Western Yunnan, China: *Earth and Planetary Science Letters*, v. 117, no. 1-2, p. 29-42, [http://doi.org/10.1016/0012-821x\(93\)90115-P](http://doi.org/10.1016/0012-821x(93)90115-P).
- Gao, L., Yang, Z., Tong, Y., Wang, H., and An, C., 2015, New paleomagnetic studies of Cretaceous and Miocene rocks from Jinggu, western Yunnan, China: Evidence for internal deformation of the Lanping-Simao Terrane: *Journal of Geodynamics*, v. 89, p. 39-59, <http://doi.org/10.1016/j.jog.2015.06.004>.
- Huang, K., and Opdyke, N. D., 1993, Paleomagnetic results from Cretaceous and Jurassic rocks of South and Southwest Yunnan: evidence for large clockwise rotations in the Indochina and Shan-Thai-Malay terranes: *Earth and Planetary Science Letters*, v. 177, no. 3-4, p. 507-524, [http://doi.org/10.1016/0012-821x\(93\)90100-n](http://doi.org/10.1016/0012-821x(93)90100-n).
- Kondo, K., Mu, C., Yamamoto, T., Zaman, H., Miura, D., Yokoyama, M., et al., 2012, Oroclinal origin of the Simao Arc in the Shan-Thai Block inferred from the Cretaceous palaeomagnetic data: *Geophysical Journal International*, v. 190, no. 1, p. 201-216, <http://doi.org/10.1111/j.1365-246X.2012.05467.x>.
- Li, S., van Hinsbergen, D. J. J., Najman, Y., Liu-Zeng, J., Deng, C., and Zhu, R., 2020, Does pulsed Tibetan deformation correlate with Indian plate motion changes? *Earth and Planetary Science Letters*, v. 536, no. 116144, <http://doi.org/10.1016/j.epsl.2020.116144>.
- Li, S., Yang, Z., Deng, C., He, H., Qin, H., Sun, L., et al., 2017, Clockwise rotations recorded in redbeds from the Jinggu Basin of northwestern Indochina: *Geological Society of America Bulletin*, v. 129, no. 9-10, p. 1100-1122, <http://doi.org/10.1130/B31637.1>.
- Otofujii, Y., Inoue, Y., Funahara, S., Murata, F., and Zheng, X., 1990, Paleomagnetic study of eastern Tibet-deformation of the Three Rivers region: *Geophysical Journal International*, v. 103, p. 85-94, <http://doi.org/10.1111/j.1365-246X.1990.tb01754.x>.
- Sato, K., Liu, Y., Wang, Y., Yokoyama, M., Yoshioka, S., Yang, Z., et al., 2007, Paleomagnetic study of Cretaceous rocks from Pu'er, western Yunnan, China: Evidence of internal deformation of the Indochina block: *Earth and Planetary Science Letters*, v. 258, no. 1-2, p. 1-15, <http://doi.org/10.1016/j.epsl.2007.02.043>.
- Sato, K., Liu, Y., Zhu, Z., Yang, Z., and Otofujii, Y., 1999, Paleomagnetic study of middle Cretaceous rocks from Yunlong, western Yunnan, China: evidence of southward displacement of Indochina: *Earth and Planetary Science Letters*, v. 165, no. 1, p. 1-15, [http://doi.org/10.1016/S0012-821x\(98\)00257-X](http://doi.org/10.1016/S0012-821x(98)00257-X).
- Sato, K., Liu, Y., Zhu, Z., Yang, Z., and Otofujii, Y., 2001, Tertiary paleomagnetic data from northwestern Yunnan, China: further evidence for large clockwise rotation of the Indochina block and its tectonic implications: *Earth and Planetary Science Letters*, v. 185, no. 1, p. 185-198, [http://doi.org/10.1016/S0012-821X\(00\)00377-0](http://doi.org/10.1016/S0012-821X(00)00377-0).
- Tanaka, K., Mu, C., Sato, K., Takemoto, K., Miura, D., Liu, Y., et al., 2008, Tectonic deformation around the eastern Himalayan syntaxis: constraints from the Cretaceous palaeomagnetic data of the Shan-Thai Block: *Geophysical Journal International*, v. 175, no. 2, p. 713-728,

- <http://doi.org/10.1111/j.1365-246X.2008.03885.x>.
- Tong, Y., Yang, Z., Wang, H., Zhang, X., An, C., Xu, Y., and Zhao, Y., 2014, The Cretaceous paleomagnetic results from the central part of the Simao Terrane in the southwest part of China and its tectonic implications: *Chinese Journal of Geophysics* 57, 179-198 (in Chinese with English abstract).
- Tong, Y., Yang, Z., Zheng, L., Xu, Y., Wang, H., Gao, L., et al., 2013, Internal crustal deformation in the northern part of Shan-Thai Block: New evidence from paleomagnetic results of Cretaceous and Paleogene redbeds: *Tectonophysics*, v. 608, p. 1138-1158, <http://doi.org/10.1016/j.tecto.2013.06.031>.
- Vaes, B., van Hinsbergen, D.J.J., and Paridaens, J., 2023, APWP-online.org: a global reference database and open-source tools for calculating apparent polar wander paths and relative paleomagnetic displacements: Submitted to *Tektonika*, Under review. <http://doi.org/10.31223/X5WD44>.
- Xu, W., et al., 2024, 50° Post-Eocene clockwise rotation of Mangkang and its implications for the oroclinal bending of the southeastern Tibetan Plateau: *Gondwana Research*, v. 129, no. 23-25, p. 23-35, <https://doi.org/10.1016/j.gr.2023.12.004>.
- Yang, X., Sun, X., Wang, H., Wang, C., Pei, J., and Yang, Z., 2022, The contributing factor of differential crustal deformation of the Lanping-Simao terrane in the southeastern edge of the Xizang (Tibetan) Plateau since late Eocene: *Geological Review*, v. 69, p. 853-873 (in Chinese with English abstract).
- Yang, Z., Yin, J., Sun, Z., Otofujii, Y., and Sato, K., 2001a, Discrepant Cretaceous paleomagnetic poles between Eastern China and Indochina: a consequence of the extrusion of Indochina: *Tectonophysics*, v. 334, no. 2, p. 101-113, [http://doi.org/10.1016/S0040-1951\(01\)00061-0](http://doi.org/10.1016/S0040-1951(01)00061-0).
- Yang, Z., Sun, Z., Ma, X., Yin, J., and Otofujii, Y., 2001b, Palaeomagnetic study of the early Tertiary on both sides of the Red River Fault and its geological implications: *Acta Geologica Sinica* v. 75, p. 35-44 (in Chinese with English abstract).
- Zhang, H., Tong, Y., Wang, H., and Yang, Z., 2012, Early Cretaceous Paleomagnetic Results of the Simao Area in the Indochina Block and Its Tectonic Implications: *Acta Geologica Sinica* v. 86, p. 923-939 (in Chinese with English abstract).
